# Supplementary material
Source: publisher figshare collection journal article supplement (https://acs.figshare.com/ndownloader/files/4673479)
Supplement: Supplementary file 1 [file 4673479]

# Supporting Information

## Thermal Conductivity of Methane Hydrate from Experiment and Molecular Simulation

*Eilis J. Rosenbaum<sup>†,+</sup>, Niall J. English<sup>\*,†,‡,1</sup>, J. Karl Johnson<sup>†,‡</sup>, David W. Shaw<sup>#</sup>,*

*and Robert P. Warzinski<sup>\*,†</sup>*

National Energy Technology Laboratory, United States Department of Energy, P.O. Box 10940, Pittsburgh, Pennsylvania 15236; NETL Support Contractor, Parsons, P.O. Box 618, South Park, PA 15129; Department of Chemical and Petroleum Engineering, University of Pittsburgh, Pittsburgh, Pennsylvania 15261; and Geneva College, Department of Engineering, 3200 College Avenue, Beaver Falls, Pennsylvania 15010

\*Address correspondence to these authors. Emails: modeling - [niall.english@ucd.ie](mailto:niall.english@ucd.ie), experimental - [robert.warzinski@netl.doe.gov](mailto:robert.warzinski@netl.doe.gov)

<sup>†</sup>National Energy Technology Laboratory

<sup>+</sup>Parsons

<sup>‡</sup>University of Pittsburgh

<sup>#</sup>Geneva College

---

<sup>1</sup> Current address: School of Chemical and Bioprocess Engineering, The Centre for Synthesis and Chemical Biology, Conway Institute of Biomolecular and Biomedical Research, University College Dublin, Belfield, Dublin 4, Ireland.

| Compaction Pressure<br>(MPa)               | Thermal Conductivity<br>(W/m·K) | Thermal Diffusivity<br>(m <sup>2</sup> /s) | Data<br>points |
|--------------------------------------------|---------------------------------|--------------------------------------------|----------------|
| Data at 261.5 K, 4.68 MPa methane pressure |                                 |                                            |                |
| 37.59 ± 0.14                               | 0.665 ± 0.013                   | 2.00E-07 ± 5.69E-09                        | 17             |
| 31.76 ± 0.15                               | 0.679 ± 0.012                   | 1.96E-07 ± 2.91E-09                        | 5              |
| 25.03 ± 0.38                               | 0.684 ± 0.012                   | 1.91E-07 ± 6.41E-09                        | 16             |
| 19.62 ± 0.04                               | 0.669 ± 0.024                   | 2.03E-07 ± 8.90E-09                        | 3              |
| 13.24 ± 0.24                               | 0.680 ± 0.020                   | 1.94E-07 ± 5.66E-09                        | 4              |
| 7.45 ± 0.02                                | 0.676 ± 0.011                   | 1.93E-07 ± 4.18E-09                        | 21             |
| 43.74 ± 0.40                               | 0.684 ± 0.006                   | 1.94E-07 ± 4.97E-09                        | 4              |
| 41.95 ± 0.31                               | 0.695 ± 0.004                   | 1.96E-07 ± 3.54E-09                        | 3              |
| 2.50 ± 0.16                                | 0.689 ± 0.008                   | 2.03E-07 ± 1.53E-09                        | 3              |
| Data at 275.4 K, 4.62 MPa methane pressure |                                 |                                            |                |
| 26.88 ± 0.21                               | 0.677 ± 0.011                   | 2.07E-07 ± 6.05E-09                        | 3              |

**Table S1.** Thermal conductivity and thermal diffusivity results for compacted methane hydrate as a function of compaction pressure and temperature. Thermal conductivity results are shown in Figure 5 and represent data taken during three out of four cycles of releasing and applying compaction pressure.

| Temperature<br>(K) | Methane Pressure<br>(MPa) | Thermal<br>Conductivity<br>(W/m·K) | Thermal Diffusivity<br>(m <sup>2</sup> /s) | Data<br>points |
|--------------------|---------------------------|------------------------------------|--------------------------------------------|----------------|
| 261.55 ± 0.01      | (*See caption)            | 0.685 ± 0.011                      | 2.01E-07 ± 5.76E-09                        | 91             |
| 275.40 ± 0.03      | (*See caption)            | 0.679 ± 0.013                      | 2.08E-07 ± 1.09E-08                        | 16             |
| 277.38 ± 0.01      | 6.30 ± 0.02               | 0.684 ± 0.002                      | 2.14E-07 ± 1.36E-10                        | 2              |

**Table S2.** Thermal conductivity and thermal diffusivity results for compacted methane hydrate as a function of temperature. Thermal conductivity and thermal diffusivity results are shown in Figures 6 and 7, respectively. Data were taken over a range of compaction pressures from 2.5 to 43.7 MPa and include the data in Table S1 and the data in Table S6 that were collected at similar methane pressures (marked with #).

| Pressure<br>(MPa) | Potential | 100 %<br>Occupation | 90 %<br>Occupation | 80 %<br>Occupation |
|-------------------|-----------|---------------------|--------------------|--------------------|
| 0.1               | TIP4P-FQ  | 972.9 $\pm$ 4.2     |                    | 948.8 $\pm$ 3.5    |
|                   | SPC/E     | 944.2 $\pm$ 3.9     |                    | 921.9 $\pm$ 4.5    |
| 9.5               | TIP4P-FQ  | 974.7 $\pm$ 3.1     | 963.7 $\pm$ 6.3    | 950.5 $\pm$ 3.2    |
|                   | SPC/E     | 945.1 $\pm$ 3.4     | 935.7 $\pm$ 6.2    | 922.9 $\pm$ 3.6    |
|                   | TIP4P-Ew  | 939.9 $\pm$ 3.9     | 927.9 $\pm$ 5.7    | 917.1 $\pm$ 4.1    |
| 15                | TIP4P-FQ  | 976.3 $\pm$ 3.5     |                    | 951.8 $\pm$ 3.6    |
|                   | SPC/E     | 945.7 $\pm$ 3.2     |                    | 923.7 $\pm$ 3.8    |
| 30                | TIP4P-FQ  | 978.7 $\pm$ 3.3     |                    | 954.5 $\pm$ 3.8    |
|                   | SPC/E     | 947.8 $\pm$ 4.1     |                    | 925.0 $\pm$ 4.4    |
| 50                | TIP4P-FQ  | 981.4 $\pm$ 3.8     |                    | 956.7 $\pm$ 3.0    |
|                   | SPC/E     | 950.2 $\pm$ 3.3     |                    | 928.2 $\pm$ 3.3    |
| 100               | TIP4P-FQ  | 984.0 $\pm$ 3.9     |                    | 956.7 $\pm$ 4.2    |
|                   | SPC/E     | 954.9 $\pm$ 3.8     |                    | 932.8 $\pm$ 3.7    |

**Table S3.** Density results (kg/m<sup>3</sup>) for 8-unit cell systems at 276 K for 80 to 100% methane occupations.

| Pressure<br>(MPa) | Potential | 100%<br>Occupation | 90%<br>Occupation | 80%<br>Occupation |
|-------------------|-----------|--------------------|-------------------|-------------------|
| 0.1               | TIP4P-FQ  | 23.55 $\pm$ 0.034  |                   | 23.55 $\pm$ 0.029 |
|                   | SPC/E     | 23.79 $\pm$ 0.033  |                   | 23.78 $\pm$ 0.039 |
| 9.5               | TIP4P-FQ  | 23.54 $\pm$ 0.025  | 23.53 $\pm$ 0.051 | 23.54 $\pm$ 0.026 |
|                   | SPC/E     | 23.78 $\pm$ 0.028  | 23.76 $\pm$ 0.052 | 23.77 $\pm$ 0.031 |
|                   | TIP4P-Ew  | 23.83 $\pm$ 0.033  | 23.83 $\pm$ 0.049 | 23.82 $\pm$ 0.035 |
| 15                | TIP4P-FQ  | 23.53 $\pm$ 0.028  |                   | 23.53 $\pm$ 0.030 |
|                   | SPC/E     | 23.78 $\pm$ 0.027  |                   | 23.76 $\pm$ 0.032 |
| 30                | TIP4P-FQ  | 23.51 $\pm$ 0.026  |                   | 23.50 $\pm$ 0.031 |
|                   | SPC/E     | 23.76 $\pm$ 0.034  |                   | 23.75 $\pm$ 0.038 |
| 50                | TIP4P-FQ  | 23.49 $\pm$ 0.030  |                   | 23.49 $\pm$ 0.024 |
|                   | SPC/E     | 23.74 $\pm$ 0.027  |                   | 23.72 $\pm$ 0.028 |
| 100               | TIP4P-FQ  | 23.46 $\pm$ 0.031  |                   | 23.49 $\pm$ 0.034 |
|                   | SPC/E     | 23.70 $\pm$ 0.031  |                   | 23.68 $\pm$ 0.031 |

**Table S4.** Lattice parameters (Å) for 8-unit cell systems at 276 K for 80 to 100% methane occupations.

| Pressure<br>(MPa) | Potential | 100 %<br>Occupation | 90 %<br>Occupation | 80 %<br>Occupation |
|-------------------|-----------|---------------------|--------------------|--------------------|
| 0.1               | TIP4P-FQ  | 0.725±0.016         |                    | 0.754±0.014        |
|                   | SPC/E     | 0.526±0.010         |                    | 0.551±0.011        |
| 9.5               | TIP4P-FQ  | 0.711±0.015         | 0.722±0.020        | 0.742±0.017        |
|                   | SPC/E     | 0.517±0.015         | 0.547±0.013        | 0.561±0.016        |
|                   | TIP4P-Ew  | 0.562±0.012         | 0.565±0.011        | 0.588±0.015        |
| 15                | TIP4P-FQ  | 0.721±0.013         |                    | 0.743±0.012        |
|                   | SPC/E     | 0.528±0.014         |                    | 0.563±0.015        |
| 30                | TIP4P-FQ  | 0.733±0.012         |                    | 0.754±0.011        |
|                   | SPC/E     | 0.538±0.010         |                    | 0.557±0.011        |
| 50                | TIP4P-FQ  | 0.722±0.018         |                    | 0.767±0.019        |
|                   | SPC/E     | 0.537±0.015         |                    | 0.578±0.017        |
| 100               | TIP4P-FQ  | 0.741±0.012         |                    | 0.764±0.015        |
|                   | SPC/E     | 0.546±0.011         |                    | 0.573±0.013        |

**Table S5.** Thermal conductivity results (W/m·K) for 8-unit cell systems at 276 K for 80 to 100% methane occupation.

| Methane Pressure<br>(MPa)      | Thermal Conductivity<br>(W/m·K) | Thermal Diffusivity<br>(m <sup>2</sup> /s) | Data<br>points |
|--------------------------------|---------------------------------|--------------------------------------------|----------------|
| <b>Data at 261.54 ± 0.01 K</b> |                                 |                                            |                |
| 10.06 ± 0.02                   | 0.713 ± 0.004                   | 2.09E-07 ± 4.68E-09                        | 2              |
| 7.59 ± 0.00                    | 0.669 ± 0.043                   | 2.25E-07 ± 1.35E-08                        | 2              |
| 5.64 ± 0.00 #                  | 0.709 ± 0.008                   | 2.10E-07 ± 6.63E-09                        | 7              |
| 4.50 ± 0.01 #                  | 0.703 ± 0.006                   | 2.12E-07 ± 8.72E-09                        | 4              |
| 3.78 ± 0.00 #                  | 0.686 ± 0.009                   | 2.17E-07 ± 9.97E-09                        | 4              |
| <b>Data at 275.41 ± 0.02 K</b> |                                 |                                            |                |
| 3.78                           | 0.694                           | 2.20E-07                                   | 1              |
| 5.59 ± 0.01 #                  | 0.684 ± 0.016                   | 2.20E-07 ± 7.28E-09                        | 5              |
| 7.47 ± 0.01                    | 0.674 ± 0.010                   | 2.13E-07 ± 5.31E-09                        | 3              |
| 8.75 ± 0.00                    | 0.666 ± 0.004                   | 2.16E-07 ± 1.97E-09                        | 3              |
| 12.43 ± 0.03                   | 0.676 ± 0.004                   | 2.12E-07 ± 2.33E-09                        | 4              |
| 14.01 ± 0.04                   | 0.678 ± 0.015                   | 2.12E-07 ± 6.03E-09                        | 4              |
| <b>Data at 277.40 ± 0.01 K</b> |                                 |                                            |                |
| 14.15 ± 0.04                   | 0.664 ± 0.008                   | 2.15E-07 ± 2.74E-09                        | 5              |
| 12.58 ± 0.02                   | 0.656 ± 0.001                   | 2.16E-07 ± 1.21E-09                        | 3              |
| 8.85 ± 0.01                    | 0.662 ± 0.012                   | 2.16E-07 ± 6.16E-09                        | 2              |
| 7.54 ± 0.01                    | 0.663 ± 0.011                   | 2.17E-07 ± 5.14E-09                        | 3              |
| 6.30 ± 0.02 #                  | 0.684 ± 0.002                   | 2.14E-07 ± 1.36E-10                        | 2              |

**Table S6.** Thermal conductivity and thermal diffusivity results for compacted methane hydrate as a function of methane gas pressure and temperature. Thermal conductivity results are shown in Figure 11. Data were taken at a minimal compaction pressure of approximately 3 MPa. (Figure 11 also includes data from Table S1; the thermal conductivity results at 261.5 K averaged to give  $0.680 \pm 0.01$  W/m·K. The data marked with a # were also used with the data in Table S2 in preparing Figures 6 and 7.)
